# Supplementary material for: Causal linkage of tobacco smoking with ageing: Mendelian randomization analysis towards telomere attrition and sarcopenia
Source: PubMed Central journal article supplement — J Cachexia Sarcopenia Muscle. 2023 Jan 25;14(2):955–63. doi: 10.1002/jcsm.13174 (PMC10067476; doi:10.1002/jcsm.13174), 2023-01-25
Supplement: JCSM-14-955-s002.pdf [file JCSM-14-955-s002.pdf]

**Supplemental Table 2.** Causal estimates by summary-level MR analysis after disregarding SNPs associated with other phenotypes by the GWAS catalog screening.

| Outcome                                                    | N of instrumented SNPs | MR-Egger intercept P value | MR methods      | Causal estimates [beta (95% CI)] | P value |
|------------------------------------------------------------|------------------------|----------------------------|-----------------|----------------------------------|---------|
| Leukocyte telomere length (Z-score)                        | 363                    | 0.530                      | MR-IVW          | -0.04 (-0.053, -0.027)           | < 0.001 |
|                                                            |                        |                            | Weighted median | -0.041 (-0.057, -0.025)          | < 0.001 |
|                                                            |                        |                            | MR-Egger        | -0.025 (-0.058, 0.007)           | 0.07    |
| Appendicular lean mass index                               | 344                    | 0.356                      | MR-IVW          | -0.007 (-0.008, -0.006)          | < 0.001 |
|                                                            |                        |                            | Weighted median | -0.005 (-0.007, -0.003)          | < 0.001 |
|                                                            |                        |                            | MR-Egger        | 0 (-0.004, 0.004)                | 0.47    |
| Walking pace (ordinal category)                            | 362                    | 0.209                      | MR-IVW          | -0.046 (-0.056, -0.035)          | < 0.001 |
|                                                            |                        |                            | Weighted median | -0.034 (-0.045, -0.024)          | < 0.001 |
|                                                            |                        |                            | MR-Egger        | -0.015 (-0.037, 0.007)           | 0.09    |
| Handgrip strength (kg)                                     | 362                    | 0.463                      | MR-IVW          | 0.125 (-0.006, 0.256)            | 0.06    |
|                                                            |                        |                            | Weighted median | 0.072 (-0.057, 0.201)            | 0.28    |
|                                                            |                        |                            | MR-Egger        | 0.38 (0.125, 0.635)              | 0.001   |
| Time on moderat-to-vigorous physical activity (hours/week) | 363                    | 0.542                      | MR-IVW          | -0.376 (-0.538, -0.214)          | < 0.001 |
|                                                            |                        |                            | Weighted median | -0.235 (-0.44, -0.031)           | 0.02    |
|                                                            |                        |                            | MR-Egger        | -0.034 (-0.427, 0.359)           | 0.44    |

MR = Mendelian randomization, SNP = single nucleotide polymorphism, MR-IVW = multiplicative random-effect inverse-variance weighted method

Causal estimates are scaled towards 2-fold increase in prevalence of tobacco smoking.
